# Supplementary material
Source: MDPI journal article supplement (https://www.mdpi.com/1424-2818/14/12/1065)
Supplement: s1 [file s1]

## Supplementary Materials

### Traditional knowledge of textile dyeing plants: A case study in the Chin ethnic group of northwestern Myanmar

Tial C. Ling<sup>1</sup>, Angkhana Inta<sup>2</sup>, Kate E. Armstrong<sup>3,4</sup>, Damon P. Little<sup>5</sup>, Pimonrat Tiansawat<sup>6,7</sup>, Yong-Ping Yang<sup>8</sup>, Patcharin Phokasem<sup>1</sup>, Za Khai Tuang<sup>9,10</sup>, Chainarong Sinpoo<sup>1</sup>, Terd Disayathanoowat<sup>1\*</sup>

**Table S1.** Locations and names of communities of collected natural dye based on plants in Chin state of Myanmar.

| Sample (S) number | Community name    | Longitude     | Latitude      | Elevation<br>(Meters above sea level) |
|-------------------|-------------------|---------------|---------------|---------------------------------------|
| S1                | Falam town        | 22°54'51.09"N | 93°40'30.00"E | 1631                                  |
| S2                | Hakha town        | 22°38'31.59"N | 93°36'14.59"E | 1867                                  |
| S3                | Hnaring town      | 22°11'25.94"N | 93°25'46.72"E | 1358                                  |
| S4                | Hriangpi village  | 22°11'51.52"N | 93°22'26.99"E | 1234                                  |
| S5                | Kanpatlet town    | 21°11'27.47"N | 94° 3'24.55"E | 1349                                  |
| S6                | Khuahrang village | 22°11'14.57"N | 93°28'28.29"E | 1520                                  |
| S7                | Leikang village   | 22° 7'53.99"N | 93°23'52.37"E | 1482                                  |
| S8                | Matupi town       | 21°36'2.38"N  | 93°26'41.25"E | 1090                                  |
| S9                | Mindat town       | 21°22'28.87"N | 93°58'21.86"E | 1391                                  |
| S10               | Sate village      | 22°10'11.33"N | 93°23'55.31"E | 1348                                  |
| S11               | Surngen village   | 22°17'49.34"N | 93°27'13.85"E | 1462                                  |
| S12               | Thangaw village   | 22°14'12.78"N | 93°29'24.86"E | 1661                                  |
| S13               | Thantlang town    | 22°41'36.51"N | 93°25'55.80"E | 1391                                  |
| S14               | Tedim town        | 23°22'53.15"N | 93°39'26.13"E | 1633                                  |

**Table S2.** Demographic characteristics of informants from nine communities.

| Factor   | Categories    | S1 | S2  | S3 | S4 | S5 | S6 | S7 | S8 | S9 | S10 | S11 | S12 | S13 | S14 |
|----------|---------------|----|-----|----|----|----|----|----|----|----|-----|-----|-----|-----|-----|
| Gender   | Female        | 59 | 94  | 92 | 81 | 45 | 76 | 85 | 55 | 72 | 90  | 87  | 90  | 94  | 63  |
|          | Male          | 30 | 90  | 92 | 82 | 33 | 74 | 85 | 48 | 50 | 88  | 87  | 88  | 90  | 50  |
| Literacy | Illiterate    | 7  | 10  | 12 | 18 | 5  | 22 | 13 | 11 | 10 | 14  | 17  | 19  | 8   | 11  |
|          | Middle school | 8  | 33  | 34 | 25 | 14 | 32 | 36 | 23 | 23 | 43  | 32  | 22  | 22  | 14  |
|          | High school   | 18 | 39  | 45 | 57 | 15 | 34 | 53 | 24 | 44 | 32  | 48  | 53  | 52  | 33  |
|          | University    | 56 | 102 | 93 | 63 | 44 | 62 | 68 | 45 | 45 | 89  | 77  | 84  | 102 | 55  |
| Age      | ≥ 60          | 10 | 18  | 18 | 13 | 8  | 16 | 18 | 8  | 14 | 12  | 14  | 12  | 18  | 8   |
|          | 50–59         | 15 | 36  | 36 | 32 | 10 | 32 | 36 | 16 | 22 | 36  | 36  | 36  | 36  | 21  |
|          | 40–49         | 34 | 40  | 40 | 34 | 14 | 26 | 40 | 21 | 21 | 40  | 34  | 40  | 40  | 22  |
|          | 30–39         | 15 | 44  | 44 | 44 | 24 | 38 | 36 | 22 | 24 | 44  | 44  | 44  | 44  | 28  |
|          | < 30          | 15 | 46  | 46 | 40 | 22 | 38 | 40 | 36 | 41 | 46  | 46  | 46  | 46  | 34  |

Abbreviations: S1= Falam; S2 = Hakha; S3 = Hnaring; S4 = Hriangpi; S5 = Kanpetlet; S6 = Khuahrang; S7 = Leikang; S8 = Matupi; S9 = Mindat; S10 = Sate; S11 = Surngen; S12 = Thangaw; S13 = Thantlang; S14 = Tedim.
